# Supplementary material for: Copper-decorated iron oxide nanoparticles highly dispersed on coal-based activated carbons: a recoverable catalyst for the reduction of 4-nitrophenol, Congo red, and Rhodamine B
Source: Royal Society of Chemistry journal article supplement (doi:10.1039/d3nj04349e), 2023-12-07
Supplement: d3nj04349e1.pdf [file d3nj04349e1.pdf]

## Supporting Information

### **Copper-decorated iron oxide nanoparticles highly dispersed on coal-based activated carbons: a recoverable catalyst for the reduction of 4-nitrophenol, Congo Red, and Rhodamine B**

Biao Zhang, Yakun Tang, Shasha Gao, Shan Wang, Lang Liu\*

State Key Laboratory of Chemistry and Utilization of Carbon Based Energy Resources; College of Chemistry, Xinjiang University, Urumqi, 830017, Xinjiang, PR China.

E-mail: liulang@xju.edu.cn; llyhs1973@sina.com

#### **Materials and methods**

**Materials.** Coal-based activated carbons (AC) were prepared according to our previously reported methods.<sup>1</sup> Copper (II) acetate monohydrate [ $\text{Cu}(\text{CH}_3\text{COO})_2 \cdot \text{H}_2\text{O}$ , 99%], Iron (III) nitrate nonahydrate [ $\text{Fe}(\text{NO}_3)_3 \cdot 9\text{H}_2\text{O}$ , 98.5%], trisodium citrate dihydrate [ $\text{C}_6\text{H}_5\text{Na}_3\text{O}_7 \cdot 2\text{H}_2\text{O}$ , 99%], hexamethylenetetramine [ $\text{C}_6\text{H}_{12}\text{N}_4$ , 99%] were purchased from Sichuan Kelong Reagent Company. All reagents were of analytical grade and used without further purification.

**Characterization.** X-ray diffraction (XRD; Bruker D8) was conducted using filtered Cu K $\alpha$  radiation. Microstructure analysis was observed by field-emission scanning electron microscopy (FESEM; Hitachi S-4800), transmission electron microscope (TEM), and high-resolution transmission electron microscope (HRTEM FEI Talos F200x). Thermogravimetric analysis (TGA; Netzsch STA 449C) was recorded from room temperature to 700 °C at a heating rate of 10 °C min<sup>-1</sup> in air atmosphere. UV-Vision absorption spectra were monitored by using a Hitachi UV-3900 spectrophotometer. X-ray photoelectron spectroscopy (XPS) was collected using a Thermo ESCALAB 250 instrument with a monochromated Al X-ray resource at

1486.6 eV. Nitrogen adsorption/desorption isotherms were obtained using an ASAP 2020 Xtended Pressure Sorption Analyzer at 77 K. The structure of carbon material in the prepared samples was characterized by the Raman spectrophotometer (Horiba HR Evolution) at 532 nm.

**Catalytic reduction of 4-nitrophenol (4-NP).** Aqueous 4-NP solution (3.0 mL, 0.1 mM) was mixed with NaBH<sub>4</sub> (250  $\mu$ L, 50 mM), resulting in the formation of a deep yellow solution. Then, 1 mg of the sample was added to the solution. The progress of the reaction was determined by UV-Vis absorption spectroscopy over a scanning range from 250 to 500 nm every 1 min. During the reaction, it could be observed that the color of the solution become colorless from light yellow.

As NaBH<sub>4</sub> was in large excess compared to 4-NP, it was reasonable to assume that its concentration remained constant throughout the reaction. The reaction could be considered as a pseudo-first-order kinetics for the 4-NP. The equation is  $-dC_t/dt = K_{app}C$ , where  $C_t$  refers to the concentration of 4-NP at time  $t$ ,  $C$  refers to the initial concentration, and  $K_{app}$  is the apparent rate constant ( $\text{min}^{-1}$ ).

As a heterogeneous catalyst, one important factor is the reusability. To evaluate this, the catalyst was carried out for five consecutive reaction cycles. In these experiments, the samples for the catalytic reaction were separated magnetically, washed with distilled water, and dried in a vacuum oven at 60 °C for 12 h.

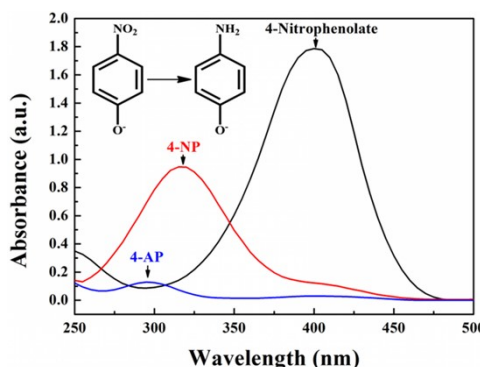

**Figure S1** UV-vis spectra of 4-NP, 4-nitrophenolate, 4-AP.

Figure S1 showed the successive reduction of 4-NP to 4-AP in aqueous medium using NaBH<sub>4</sub>. The maximum absorption peak of 4-NP appeared at 317 nm in an acidic or neutral environment. After adding NaBH<sub>4</sub>, the absorption peak was shifted to

400 nm due to the formation of the corresponding nitrophenolate anion. Moreover, the color of the solution changed from light yellow to bright yellow.

**Catalytic reduction of congo red (CR).** CFO/AC nanocomposite (1.0 mg) and 250  $\mu$ l newly prepared  $\text{NaBH}_4$  (50 mM) were added into the CR solution ( $3.63 \times 10^{-5}$  M, 2 ml) at room temperature. The UV-visible spectra showed no CR absorbance peak at 493 nm after 2 min. The reaction rate was monitored by recording the UV-vis spectra at certain intervals.

**Catalytic reduction of rhodamine B (RhB).** CFO/AC nanocomposite (1.0 mg) and 250  $\mu$ l newly prepared  $\text{NaBH}_4$  (50 mM) were added into the RhB solution ( $4.03 \times 10^{-5}$  M, 2 ml) at room temperature. The UV-visible spectra showed no CR absorbance peak at 559 nm after 2 min. The reaction rate was monitored by recording the UV-vis spectra at certain intervals.

**Table. S1** Conditions for preparing samples.

| CFO: AC<br>T (°C) | t (h)             |                |                |
|-------------------|-------------------|----------------|----------------|
|                   | 2.5               | 3.5            | 4.5            |
| 300               | 1: 1(CFO/AC-1)    |                |                |
|                   | 1: 0.75(CFO/AC-6) |                |                |
| 400               | 1: 1(CFO/AC-4)    | 1: 1(CFO/AC-2) | 1: 1(CFO/AC-5) |
|                   | 1: 1.5(CFO/AC-7)  |                |                |
| 500               | 1: 1(CFO/AC-3)    |                |                |

Note: the calcination temperature (T), calcination time (t), and mass ratio of copper-decorated iron oxide: AC.

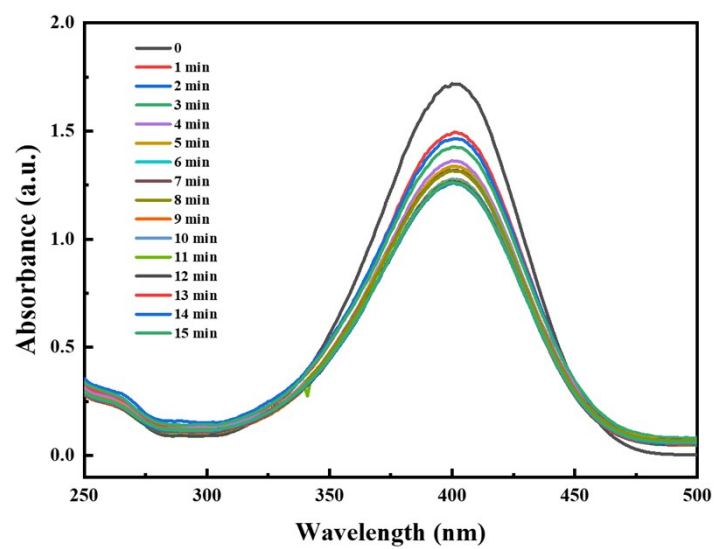

**Figure S2** UV-Vis spectra of the catalytic performances of AC.

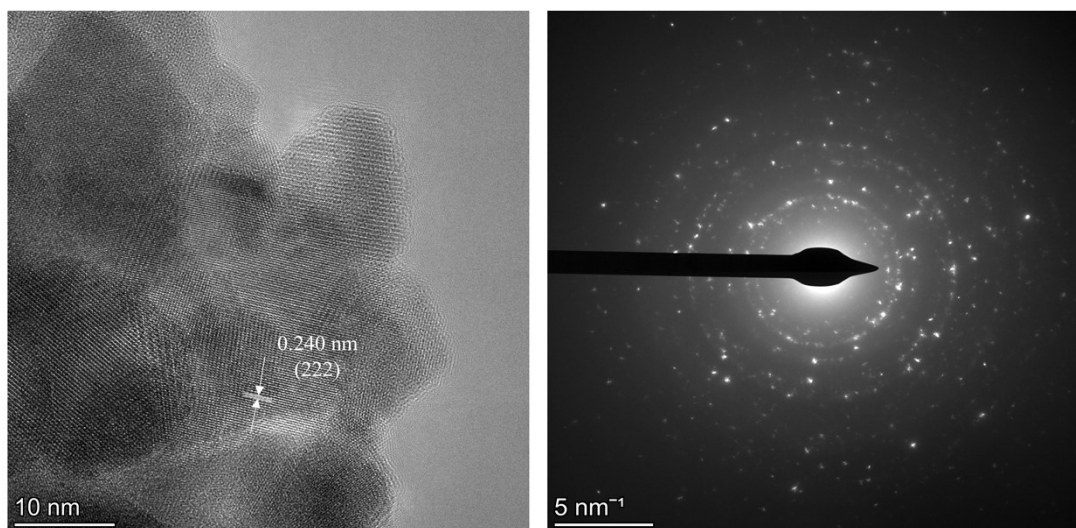

**Figure S3** HRTEM image and SAED pattern of CFO/AC-2.

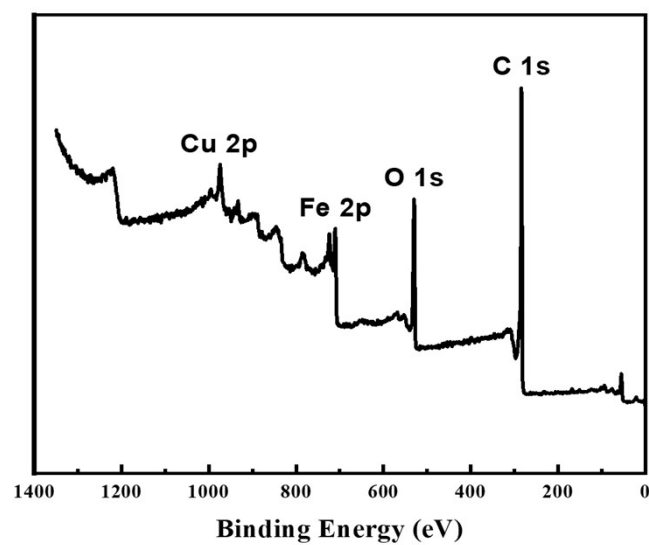

**Figure S4** XPS full spectrum of CFO/AC-2.

**Table S2** DFT surface area, total volume of samples.

| Parameter                                       | CFO/AC-6 | CFO/AC-2 | CFO/AC-7 | AC      |
|-------------------------------------------------|----------|----------|----------|---------|
| $S_{\text{DFT}}/\text{m}^2 \cdot \text{g}^{-1}$ | 936.39   | 1002.19  | 1057.09  | 1346.73 |
| $V_t/\text{cm}^3 \cdot \text{g}^{-1}$           | 0.48     | 0.52     | 0.54     | 0.63    |

**Table S3** The composition of buffer solutions with different pH values.

| pH value   | composition of buffer solution                                                 |
|------------|--------------------------------------------------------------------------------|
| pH=3, 4, 5 | citric acid – sodium citrate (0.1 mol/L)                                       |
| pH=6.5, 7  | $\text{KH}_2\text{PO}_4$ (0.05mol/L)-NaOH                                      |
| pH=7.8     | $\text{KH}_2\text{PO}_4$ (0.032 mol/L)- $\text{K}_2\text{HPO}_4$ (0.003 mol/L) |
| pH=9       | $\text{NaCO}_3$ - $\text{NaHCO}_3$ (0.1 mol/L)                                 |
| pH=10, 11  | $\text{NaHCO}_3$ (0.05mol/L)-NaOH                                              |

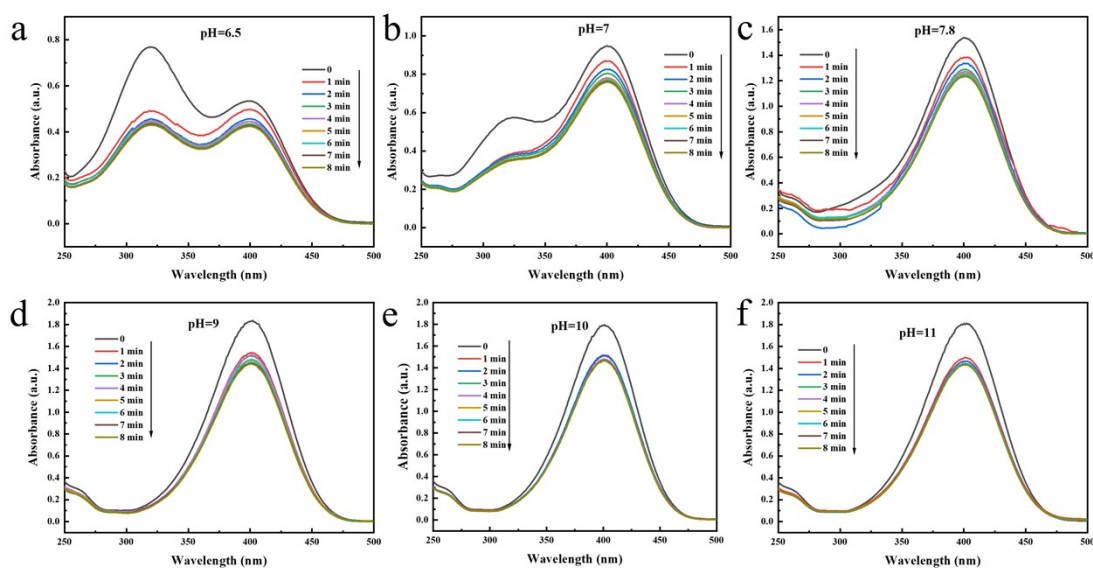

**Figure S5** UV-Vis spectra of 4-NP degradation at different pH in the presence of CFO/AC-2 (1:1).

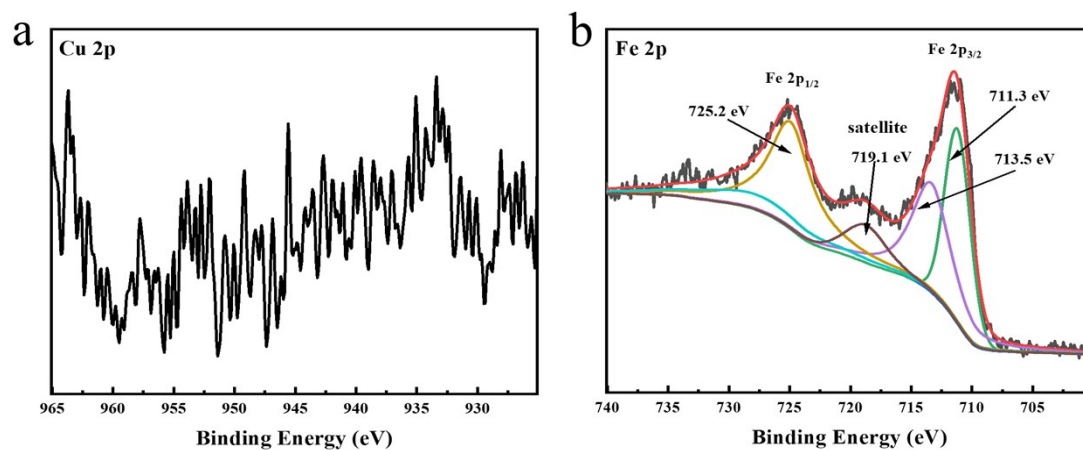

**Figure S6** high-resolution XPS spectra of the recycled catalyst's Cu 2p (b) and Fe 2p (c).

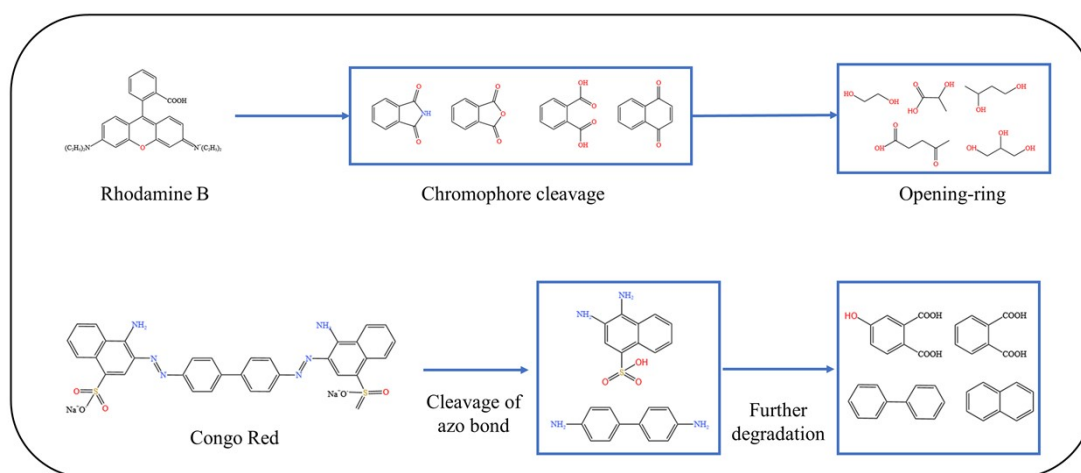

**Figure S7** Probable mechanism for degradation of Rhodamine B and Congo Red.

**Table S4** Comparison of copper-decorated iron oxide/AC nano-catalysts for the reduction of CR  
and RhB.

| Dyes | Catalyst                                     | Time        | Ref.              |
|------|----------------------------------------------|-------------|-------------------|
| CR   | Copper nanocrystals                          | 500s        | 2                 |
|      | Co <sub>3</sub> O <sub>4</sub> nanoparticles | 5min        | 3                 |
|      | Cu nanoparticles                             | 22min       | 4                 |
|      | /GO/MnO <sub>2</sub>                         |             |                   |
|      | Cu/eggshell                                  | 30min       | 5                 |
|      | Fe <sub>3</sub> O <sub>4</sub> /eggshell     | 20min       |                   |
|      | <b>CFO/AC-2</b>                              | <b>2min</b> | <b>This work</b>  |
|      | SiNWAs-Cu                                    | 14min       | 6                 |
|      | Au-PANI                                      | 15min       | 7                 |
|      | nanocomposite                                |             |                   |
| RhB  | CoFe <sub>2</sub> O <sub>4</sub> -P4VP@Ag    | 20min       | 8                 |
|      | nanoparticles                                |             |                   |
|      | PVA-PDA@Au beads                             | 5min        | 9                 |
|      | <b>CFO/AC-2</b>                              | <b>2min</b> | <b>This works</b> |

## References

- [1] L.X. Wang, R.R. Wang, H.Y. Zhao, L. Liu and D.Z. Jia, High Rate Performance Porous Carbon Prepared from Coal for Supercapacitors. *Mater. Lett.* 2015, **149**, 85-88.
- [2] S. Naghdi, M. Sajjadi, M. Nasrollahzadeh, K.Y. Rhee, S.M. Sajadi and B. Jaleh, Cuscuta reflexa leaf extract mediated green synthesis of the Cu nanoparticles on graphene oxide/manganese dioxide nanocomposite and its catalytic activity toward reduction of nitroarenes and organic dyes. *J. Taiwan Inst. Chem. E.* 2018, **86**: 158-173.
- [3] A. Khalil, N. Ali, A. Khan, A.M. Asiri and T. Kamal, Catalytic potential of cobalt oxide and agar nanocomposite hydrogel for the chemical reduction of organic pollutants. *Int. J. Biol. Macromol.* 2020, **164**: 2922-2930.
- [4] B.R. Ganapuram, M. Alle, R. Dadigala, A. Dasari, V. Maragoni and V. Guttena, Catalytic reduction of methylene blue and Congo red dyes using green synthesized gold nanoparticles capped by salmalia malabarica gum. *Int. Nano. Lett.* 2015, **5**, 215-222.
- [5] V. Nasrollahzadeh, S.M. Sajadi and A. Hatamifard, Waste chicken eggshell as a natural valuable resource and environmentally benign support for biosynthesis of catalytically active Cu/eggshell, Fe<sub>3</sub>O<sub>4</sub>/eggshell and Cu/Fe<sub>3</sub>O<sub>4</sub>/eggshell nanocomposites. *Appl. Catal. B: Environ.* 2016, **191**, 209-227.
- [6] X.L. Yang, H. Zhong, Y.H. Zhu, H.L. Jiang, J.H. Shen, J.F. Huang and C.Z. Li, Highly efficient reusable catalyst based on silicon nanowire arrays decorated with copper nanoparticles. *J. Mater. Chem. A*, **2014**, 2 (24), 9040-9047.
- [7] Y. Li, Y. Wang, H. Lu and X. Li, Preparation of CoFe<sub>2</sub>O<sub>4</sub>-P4VP@ Ag NPs as effective and recyclable catalysts for the degradation of organic pollutants with NaBH<sub>4</sub> in water. *Int. J. Hydrog. Energy* 2020, **45**: 16080-16093.
- [8] Y. Li, H. Lu, Y. Wang and X. Li, Deposition of Au nanoparticles on PDA-functionalized PVA beads as a recyclable catalyst for degradation of organic pollutants with NaBH<sub>4</sub> in aqueous solution. *J. Alloys Compd.* 2019, **793**: 115-126.
- [9] M. Atarod, M. Nasrollahzadeh and S.M. Sajadi, Green synthesis of a Cu/reduced graphene oxide/Fe<sub>3</sub>O<sub>4</sub> nanocomposite using Euphorbia wallichii leaf extract and its application as a recyclable and heterogeneous catalyst for the reduction of 4-nitrophenol and rhodamine B. *RSC*

*Adv.* 2015, **5**, 91532-91543.
